# Supplementary material for: A Review of Web-Based Nutrition Information in Spanish for Cancer Patients and Survivors
Source: MDPI journal article supplement (doi:10.3390/nu14071441), 2022-03-30
Supplement: s1 [file s1]

**Table S1.** International Patients Decisions Aid Standards Scores (IPDAS).

|                                                                                                                                                                                              | AECC | GEICAM | AEAL | SEOM / Oncosaludable | FECEC | SAV / Ayuda al Paciente Oncológico | ACS | NCI | ICO / Què i Com Menjar Durant el |
|----------------------------------------------------------------------------------------------------------------------------------------------------------------------------------------------|------|--------|------|----------------------|-------|------------------------------------|-----|-----|----------------------------------|
| <b>1. Start with a clear statement of aims?</b>                                                                                                                                              |      |        |      |                      |       |                                    |     |     |                                  |
| 1.1. Describes its purpose (e.g., to aid decision-making)                                                                                                                                    | *    | *      | *    | *                    | *     | *                                  | *   | *   | *                                |
| 1.2. Describes what it covers (to help the reader judge whether it's worth carrying on)                                                                                                      | *    | *      | *    | *                    | *     | *                                  | *   | *   | *                                |
| 1.3. Describes who it is for (i.e., which patient groups)                                                                                                                                    | *    | *      | *    | *                    | *     | *                                  | *   | *   | *                                |
| Points                                                                                                                                                                                       | 3    | 3      | 3    | 3                    | 3     | 3                                  | 3   | 3   | 3                                |
| <b>2. Provide unbiased and detailed information about options?</b>                                                                                                                           |      |        |      |                      |       |                                    |     |     |                                  |
| 2.1. Describes the health condition                                                                                                                                                          | *    | *      | *    | *                    | *     | *                                  | *   | *   | *                                |
| 2.2. Describes the natural course without treatment                                                                                                                                          |      |        |      |                      |       |                                    |     |     |                                  |
| 2.3. Lists the treatment/management/lifestyle options                                                                                                                                        | *    | *      | *    | *                    | *     | *                                  | *   | *   | *                                |
| 2.4. Describes benefits of options                                                                                                                                                           | *    |        | *    | *                    | *     | *                                  | *   | *   | *                                |
| 2.5. Describes risks options (harms/side-effects/disadvantages)                                                                                                                              | *    | *      | *    | *                    | *     | *                                  | *   | *   | *                                |
| 2.6. Describes uncertainty around the current evidence (i.e., what is not known)                                                                                                             | *    |        |      | *                    | *     |                                    | *   |     | *                                |
| 2.7. Describes procedures (i.e., treatments, targets, monitoring, behaviour change, etc.)                                                                                                    | *    | *      | *    | *                    | *     | *                                  | *   | *   | *                                |
| Points (out of 7)                                                                                                                                                                            | 6    | 4      | 5    | 6                    | 6     | 5                                  | 6   | 5   | 6                                |
| <b>3. Present probabilities of outcomes in an understandable way?</b>                                                                                                                        |      |        |      |                      |       |                                    |     |     |                                  |
| 3.1. Uses event rates specifying the population and, if appropriate, time period                                                                                                             | *    | *      | *    | *                    | *     | *                                  | *   | *   |                                  |
| 3.2. Compares outcome probabilities using the same numerator/denominator, time period, scale (i.e., if numerators/denominators, time periods or scales are used, they need to be consistent) |      |        |      |                      |       |                                    |     |     |                                  |
| 3.3. Uses visual diagrams and/or places probabilities in context of other familiar events                                                                                                    |      |        |      |                      |       |                                    |     |     |                                  |
| Points (out of 3)                                                                                                                                                                            | 1    | 1      | 1    | 1                    | 1     | 1                                  | 1   | 1   | 0                                |
| <b>4. Contain accurate information?</b>                                                                                                                                                      |      |        |      |                      |       |                                    |     |     |                                  |
| 4.1. Clearly states the evidence sources used in compiling the information                                                                                                                   |      | *      |      | *                    |       |                                    |     | *   |                                  |
| 4.2. Information quoted is in line with the most up-to-date clinical evidence                                                                                                                | *    | *      | *    | *                    | *     | *                                  | *   | *   | *                                |
| 4.3. Where mentioned, prevalence estimates give an accurate impression of how common/rare the condition is                                                                                   |      |        |      |                      |       |                                    |     |     |                                  |
| 4.4. Personal opinion and/or advertising are clearly distinguished from evidence-based information                                                                                           | *    | *      | *    | *                    | *     | *                                  | *   | *   | *                                |
| Points (out of 4)                                                                                                                                                                            | 2    | 3      | 2    | 3                    | 2     | 2                                  | 2   | 3   | 2                                |
| <b>5. Help patients to make appropriate decisions</b>                                                                                                                                        |      |        |      |                      |       |                                    |     |     |                                  |
| 5.1. Acknowledges (explicitly or implicitly) that the patient has decisions to make                                                                                                          | *    | *      | *    | *                    | *     | *                                  | *   | *   | *                                |
| 5.2. Helps patients to imagine what it is like to live with the condition and/or treatment effects                                                                                           | *    | *      | *    | *                    | *     | *                                  | *   | *   | *                                |
| 5.3. Asks patients to consider factors (e.g., priorities, motivations, treatment outcomes) affecting possible courses of action                                                              | *    |        |      |                      | *     | *                                  | *   |     |                                  |
| 5.4. Suggests ways and/or provides tools to help patients make decisions                                                                                                                     | *    | *      | *    | *                    | *     | *                                  | *   | *   | *                                |
| Points (out of 4)                                                                                                                                                                            | 4    | 3      | 3    | 3                    | 4     | 4                                  | 4   | 3   | 3                                |
| <b>6. Disclose conflicts of interest?</b>                                                                                                                                                    |      |        |      |                      |       |                                    |     |     |                                  |
| 6.1. Includes authors' / developers' credentials or qualifications                                                                                                                           | *    | *      |      | *                    | *     | *                                  | *   | *   | *                                |

|                                                                                                 |           |           |           |           |           |           |           |           |           |
|-------------------------------------------------------------------------------------------------|-----------|-----------|-----------|-----------|-----------|-----------|-----------|-----------|-----------|
| 6.2. Reports source of funding to develop and distribute the patient decision aid               | *         | *         | *         | *         | *         | *         | *         | *         | *         |
| Points (out of 2)                                                                               | 2         | 2         | 1         | 2         | 2         | 2         | 2         | 2         | 1         |
| <b>7. Have a clear structure and layout?</b>                                                    |           |           |           |           |           |           |           |           |           |
| 7.1. Is consistent in design and layout throughout                                              | *         | *         | *         | *         | *         | *         | *         | *         | *         |
| 7.2. Includes aids to finding information (e.g., contents, index, site map, or search facility) | *         | *         | *         | *         |           | *         | *         | *         | *         |
| 7.3. Important points are emphasised through the use of summaries and/or bullet points          | *         | *         | *         | *         | *         | *         | *         | *         | *         |
| 7.4. Illustrates information with diagrams and/or pictures                                      | *         | *         | *         | *         | *         | *         | *         | *         | *         |
| 7.5. Where diagrams appear, they are labelled and relate to the subject matter                  |           |           |           |           | *         |           |           |           |           |
| 7.6. Sections are clearly separated                                                             | *         | *         | *         | *         | *         | *         | *         | *         | *         |
| Points (out of 6)                                                                               | 5         | 5         | 5         | 5         | 5         | 5         | 5         | 5         | 5         |
| <b>8. Help the reader judge its reliability</b>                                                 |           |           |           |           |           |           |           |           |           |
| 8.1. Reports date of publication                                                                | *         | *         |           | *         | *         | *         | *         |           |           |
| 8.2. Includes sources of further information                                                    |           |           |           | *         |           |           | *         | *         |           |
| Points (out of 2)                                                                               | 1         | 1         | 0         | 2         | 1         | 1         | 2         | 1         | 0         |
| <b>Total points (out of 31)</b>                                                                 | <b>24</b> | <b>22</b> | <b>20</b> | <b>22</b> | <b>24</b> | <b>23</b> | <b>25</b> | <b>23</b> | <b>20</b> |

ASC, American Cancer Society; AEAL, Asociación Española de Afectados por Linfoma, Mieloma, Leucemia; AECC, Asociación Española Contra el Cáncer; FECEC, Federació Catalana Entitats Contra el Càncer; GEICAM, Geicam, Investigación en Cáncer de Mama; ICO, Institut Català d'Oncologia; Max, Maximum score; NCI, National Cancer Institute; SD, Standard deviation; SAV, Sociedad Anticancerosa de Venezuela; SEOM, Sociedad Española de Oncología Médica.

**Table S2.** National cancer organizations in Spanish ordered by country.

|    | <b>Organizations</b>                                               | <b>Country of Origin</b> | <b>Websites</b>                                                                             | <b>Links to Nutrition-Cancer Content</b>                                                                                                                          |
|----|--------------------------------------------------------------------|--------------------------|---------------------------------------------------------------------------------------------|-------------------------------------------------------------------------------------------------------------------------------------------------------------------|
| 1  | Sociedad Latinoamericana y del Caribe de Oncología Médica (SLACOM) | Argentina                | <a href="https://www.slacom.org/">https://www.slacom.org/</a>                               |                                                                                                                                                                   |
| 2  | Instituto Nacional de Cáncer en Argentina                          | Argentina                | <a href="https://www.argentina.gob.ar/">https://www.argentina.gob.ar/</a>                   |                                                                                                                                                                   |
| 3  | Asociación Leucemia Mieloide de Argentina (ALMA)                   | Argentina                | <a href="https://asociacionalma.org.ar/">https://asociacionalma.org.ar/</a>                 |                                                                                                                                                                   |
| 4  | Fundación SALES                                                    | Argentina                | <a href="https://sales.org.ar/">https://sales.org.ar/</a>                                   |                                                                                                                                                                   |
| 5  | Instituto Oncológico Henry Moore                                   | Argentina                | <a href="http://www.hmoore.com.ar/">http://www.hmoore.com.ar/</a>                           | <a href="http://www.hmoore.com.ar/pacientes.php">http://www.hmoore.com.ar/pacientes.php</a>                                                                       |
| 6  | Liga Argentina de Lucha Contra el Cáncer                           | Argentina                | <a href="https://www.lalcec.org.ar/">https://www.lalcec.org.ar/</a>                         |                                                                                                                                                                   |
| 7  | Linfomas Argentina                                                 | Argentina                | <a href="https://www.linfomasargentina.org/">https://www.linfomasargentina.org/</a>         |                                                                                                                                                                   |
| 8  | Fundación Argentina de Mieloma                                     | Argentina                | <a href="http://www.mieloma.org.ar/">http://www.mieloma.org.ar/</a>                         |                                                                                                                                                                   |
| 9  | Fundación Pacientes Cáncer de Pulmón                               | Argentina                | <a href="https://www.pacientescancerpulmon.org/">https://www.pacientescancerpulmon.org/</a> |                                                                                                                                                                   |
| 10 | Fundación ACIAPO                                                   | Argentina                | <a href="https://fundacionaciapo.org.ar/">https://fundacionaciapo.org.ar/</a>               |                                                                                                                                                                   |
| 11 | Fundación FUCA Argentina                                           | Argentina                | <a href="https://fuca.org.ar/">https://fuca.org.ar/</a>                                     |                                                                                                                                                                   |
| 12 | Movimiento Ayuda Cáncer de Mama (MACMA)                            | Argentina                | <a href="http://www.macma.org.ar/">http://www.macma.org.ar/</a>                             |                                                                                                                                                                   |
| 13 | Centro de Investigación, Educación y Servicio                      | Bolivia                  | <a href="http://www.cies.org.bo/">http://www.cies.org.bo/</a>                               |                                                                                                                                                                   |
| 14 | Fundación Boliviana de Lucha Contra el Cáncer                      | Bolivia                  | <a href="https://www.fubolcancer.com/">https://www.fubolcancer.com/</a>                     |                                                                                                                                                                   |
| 15 | Fundación Arturo López Pérez                                       | Chile                    | <a href="https://www.institutoncologicofalp.cl/">https://www.institutoncologicofalp.cl/</a> | <a href="https://www.institutoncologicofalp.cl/apoyo-paciente/alimentacion-cancer/">https://www.institutoncologicofalp.cl/apoyo-paciente/alimentacion-cancer/</a> |
| 16 | Fundación Chile sin Cáncer                                         | Chile                    | <a href="https://chilesincancer.cl/">https://chilesincancer.cl/</a>                         |                                                                                                                                                                   |
| 17 | Instituto Nacional del Cáncer de Chile                             | Chile                    | <a href="https://www.incancer.cl/">https://www.incancer.cl/</a>                             |                                                                                                                                                                   |
| 18 | Fundación Chilena para el Desarrollo de la Oncología               | Chile                    | <a href="http://www.cancerchile.cl/">http://www.cancerchile.cl/</a>                         |                                                                                                                                                                   |
| 19 | Corporación Nacional del Cáncer                                    | Chile                    | <a href="https://www.conac.cl/">https://www.conac.cl/</a>                                   |                                                                                                                                                                   |
| 20 | Corporación Nacional Maxi-Vida                                     | Chile                    | <a href="https://maxivida.cl/">https://maxivida.cl/</a>                                     |                                                                                                                                                                   |
| 21 | Instituto Nacional de Cancerología                                 | Colombia                 | <a href="https://www.cancer.gov.co/">https://www.cancer.gov.co/</a>                         |                                                                                                                                                                   |
| 22 | Liga Colombiana Contra el Cáncer                                   | Colombia                 | <a href="https://www.ligacancercolombia.org/">https://www.ligacancercolombia.org/</a>       | <a href="https://www.ligacancercolombia.org/galeria-multimedia/">https://www.ligacancercolombia.org/galeria-multimedia/</a>                                       |
| 23 | Fundación Esperanza Viva                                           | Colombia                 | <a href="https://fundacionesperanzaviva.com/">https://fundacionesperanzaviva.com/</a>       |                                                                                                                                                                   |
| 24 | Fundación Santa Fe de Bogotá                                       | Colombia                 | <a href="http://www.fsfb.org.co">http://www.fsfb.org.co</a>                                 |                                                                                                                                                                   |
| 25 | Fundación SIMMON                                                   | Colombia                 | <a href="https://www.simmoncancer.org/">https://www.simmoncancer.org/</a>                   | <a href="https://www.simmoncancer.org/docs/sobre-el-cancer/nutricion/">https://www.simmoncancer.org/docs/sobre-el-cancer/nutricion/</a>                           |
| 26 | Asociación de Enfermería Oncológica Colombiana                     | Colombia                 | <a href="https://aeocol.com/">https://aeocol.com/</a>                                       |                                                                                                                                                                   |
| 27 | Asociación de Enfermeras Oncohematológicas                         | Costa Rica               | <a href="https://www.aeohpri.org/">https://www.aeohpri.org/</a>                             |                                                                                                                                                                   |

|    |                                                                             |                    |                                                                                       |                                                                                                                                                             |
|----|-----------------------------------------------------------------------------|--------------------|---------------------------------------------------------------------------------------|-------------------------------------------------------------------------------------------------------------------------------------------------------------|
| 28 | Fundación Amigos Contra el Cáncer Infantil                                  | Dominican Republic | <a href="https://www.facci.org.do/">https://www.facci.org.do/</a>                     |                                                                                                                                                             |
| 29 | Sociedad de Lucha Contra el Cáncer del Ecuador                              | Ecuador            | <a href="https://www.solca.med.ec/">https://www.solca.med.ec/</a>                     |                                                                                                                                                             |
| 30 | CEPREME Juntos contra el cáncer                                             | Ecuador            | <a href="https://www.mujercepreme.com/">https://www.mujercepreme.com/</a>             |                                                                                                                                                             |
| 31 | Fundación Jóvenes Contra el Cáncer                                          | Ecuador            | <a href="https://jovenescontraelcancer.org/">https://jovenescontraelcancer.org/</a>   |                                                                                                                                                             |
| 32 | Liga Contra el Cáncer - Honduras                                            | Honduras           | <a href="https://www.ligacontraelcancer.hn/">https://www.ligacontraelcancer.hn/</a>   |                                                                                                                                                             |
| 33 | Federación Latinoamericana de Sociedades de Oncología                       | Latin America      | <a href="https://www.flasca.com/">https://www.flasca.com/</a>                         |                                                                                                                                                             |
| 34 | Fundación Cima                                                              | Mexico             | <a href="https://www.cimafundacion.org/">https://www.cimafundacion.org/</a>           | <a href="https://www.cimafundacion.org/guia-para-el-paciente-y-calidad-de-vida/">https://www.cimafundacion.org/guia-para-el-paciente-y-calidad-de-vida/</a> |
| 35 | Asociación Mexicana de Sobrevivientes al Cáncer Oncoayuda                   | Mexico             | <a href="https://oncoayuda.org/">https://oncoayuda.org/</a>                           |                                                                                                                                                             |
| 36 | Cada de la Amistad para Niños con Cáncer                                    | Mexico             | <a href="https://www.casadelaamistad.org.mx/">https://www.casadelaamistad.org.mx/</a> |                                                                                                                                                             |
| 37 | Grupo de Recuperación Total Reto                                            | Mexico             | <a href="https://www.gruporeto.org/">https://www.gruporeto.org/</a>                   |                                                                                                                                                             |
| 38 | Instituto Nacional de Cancerología                                          | Mexico             | <a href="http://www.incan-mexico.org/">http://www.incan-mexico.org/</a>               |                                                                                                                                                             |
| 39 | Sociedad Mexicana de Radioterapeutas                                        | Mexico             | <a href="https://www.somera.org.mx/">https://www.somera.org.mx/</a>                   |                                                                                                                                                             |
| 40 | Tómalo a Pecho                                                              | Mexico             | <a href="http://tomateloapecho.org.mx/">http://tomateloapecho.org.mx/</a>             |                                                                                                                                                             |
| 41 | Unidos, Asociación Pro-Trasplante de Medula Ósea. Francisco Casares Cortina | Mexico             | <a href="https://www.uni2.org.mx/">https://www.uni2.org.mx/</a>                       |                                                                                                                                                             |
| 42 | Asociación Mexicana de Lucha Contra el Cáncer                               | Mexico             | <a href="https://www.amlcc.org/">https://www.amlcc.org/</a>                           |                                                                                                                                                             |
| 43 | Fundación de Alba                                                           | Mexico             | <a href="https://fundaciondealba.org/">https://fundaciondealba.org/</a>               |                                                                                                                                                             |
| 44 | Asociación Mexicana de Leucemia y GIST                                      | Mexico             | <a href="http://ameleg.org.mx/">http://ameleg.org.mx/</a>                             |                                                                                                                                                             |
| 45 | Sociedad Mexicana de Oncología                                              | Mexico             | <a href="https://www.smeo.org.mx/">https://www.smeo.org.mx/</a>                       |                                                                                                                                                             |
| 46 | Asociación Peruana Vida sin Cáncer                                          | Peru               | <a href="http://vidassincancer.org.pe/">http://vidassincancer.org.pe/</a>             |                                                                                                                                                             |
| 47 | Esperantra Peru                                                             | Peru               | <a href="http://www.esperantra.org/">http://www.esperantra.org/</a>                   |                                                                                                                                                             |
| 48 | Fundación Peruana de Cáncer                                                 | Peru               | <a href="https://fpc.pe/">https://fpc.pe/</a>                                         |                                                                                                                                                             |
| 49 | Instituto Peruano de Oncología & Radioterapia                               | Peru               | <a href="https://www.ipor.pe/">https://www.ipor.pe/</a>                               | <a href="https://www.ipor.pe/pacientes/nutricion-oncologica/">https://www.ipor.pe/pacientes/nutricion-oncologica/</a>                                       |
| 50 | Sociedad Peruana de Oncología Médica                                        | Peru               | <a href="https://www.spomedica.org/">https://www.spomedica.org/</a>                   | <a href="https://www.spomedica.org/informacion-para-pacientes/">https://www.spomedica.org/informacion-para-pacientes/</a>                                   |
| 51 | Instituto Nacional de Enfermedades Neoplásicas de Perú                      | Peru               | <a href="https://portal.inen.sld.pe/">https://portal.inen.sld.pe/</a>                 |                                                                                                                                                             |
| 52 | La Liga Peruana de Lucha Contra el Cáncer                                   | Peru               | <a href="https://ligacancer.org.pe/">https://ligacancer.org.pe/</a>                   |                                                                                                                                                             |
| 53 | ALIADA Centro Oncológico Perú                                               | Peru               | <a href="https://www.aliada.com.pe/">https://www.aliada.com.pe/</a>                   |                                                                                                                                                             |
| 54 | Asociación de Niños con Cáncer                                              | Spain              | <a href="https://afanoc.org/">https://afanoc.org/</a>                                 |                                                                                                                                                             |
| 55 | Asociación de Padres de Niños con Cáncer                                    | Spain              | <a href="https://www.asion.org/">https://www.asion.org/</a>                           |                                                                                                                                                             |
| 56 | Fundación Instituto Valenciano de Oncología                                 | Spain              | <a href="https://www.ivo.es/">https://www.ivo.es/</a>                                 |                                                                                                                                                             |
| 57 | Institut Català d'Oncologia                                                 | Spain              | <a href="http://ico.gencat.cat/">http://ico.gencat.cat/</a>                           | <a href="https://menjardurantelcancer.cat/">https://menjardurantelcancer.cat/</a>                                                                           |

|    |                                                                  |       |                                                                                                                        |                                                                                                                                                                                                                                                                                                                                                                                                                                                                                                                                                                                                                                                                                            |
|----|------------------------------------------------------------------|-------|------------------------------------------------------------------------------------------------------------------------|--------------------------------------------------------------------------------------------------------------------------------------------------------------------------------------------------------------------------------------------------------------------------------------------------------------------------------------------------------------------------------------------------------------------------------------------------------------------------------------------------------------------------------------------------------------------------------------------------------------------------------------------------------------------------------------------|
|    |                                                                  |       | <a href="https://mejorsincancer.org/">https://mejorsincancer.org/</a>                                                  |                                                                                                                                                                                                                                                                                                                                                                                                                                                                                                                                                                                                                                                                                            |
| 58 | Asociación Española de la Anemia de Fanconi                      | Spain | <a href="https://anemiadefanconi.org/">https://anemiadefanconi.org/</a>                                                |                                                                                                                                                                                                                                                                                                                                                                                                                                                                                                                                                                                                                                                                                            |
| 59 | El Grupo Español de Investigación en Cáncer de Ovario            | Spain | <a href="https://www.geicogroup.com/">https://www.geicogroup.com/</a>                                                  |                                                                                                                                                                                                                                                                                                                                                                                                                                                                                                                                                                                                                                                                                            |
| 60 | Fundación Josep Carreras contra la Leucemia                      | Spain | <a href="https://www.fcarreras.org/es">https://www.fcarreras.org/es</a>                                                | <a href="https://www.fcarreras.org/es/alimentacion_1211484">https://www.fcarreras.org/es/alimentacion_1211484</a>                                                                                                                                                                                                                                                                                                                                                                                                                                                                                                                                                                          |
| 61 | Sociedad Española de Enfermería Oncológica                       | Spain | <a href="https://seeo.org/">https://seeo.org/</a>                                                                      |                                                                                                                                                                                                                                                                                                                                                                                                                                                                                                                                                                                                                                                                                            |
| 62 | Federación Española de Cáncer de Mama                            | Spain | <a href="http://nuevofecma.vinagrero.es/">http://nuevofecma.vinagrero.es/</a>                                          |                                                                                                                                                                                                                                                                                                                                                                                                                                                                                                                                                                                                                                                                                            |
| 63 | Geicam, Investigación en Cáncer de Mama                          | Spain | <a href="https://www.geicam.org/">https://www.geicam.org/</a>                                                          | <a href="https://www.geicam.org/wp-content/uploads/2018/10/3251-MAIL-actualizacion-Guias-Nutricion-Ejercicio-Cancer-Mama.pdf">https://www.geicam.org/wp-content/uploads/2018/10/3251-MAIL-actualizacion-Guias-Nutricion-Ejercicio-Cancer-Mama.pdf</a>                                                                                                                                                                                                                                                                                                                                                                                                                                      |
| 64 | Asociación Española de Afectados por Linfoma, Mieloma y Leucemia | Spain | <a href="http://www.aeal.es/">http://www.aeal.es/</a>                                                                  | <a href="http://www.aeal.es/alimentacion-y-nutricion/">http://www.aeal.es/alimentacion-y-nutricion/</a>                                                                                                                                                                                                                                                                                                                                                                                                                                                                                                                                                                                    |
| 65 | Fundación CRIS Contra el Cáncer                                  | Spain | <a href="https://criscancer.org/es/">https://criscancer.org/es/</a>                                                    |                                                                                                                                                                                                                                                                                                                                                                                                                                                                                                                                                                                                                                                                                            |
| 66 | Fundación Theodora                                               | Spain | <a href="https://es.theodora.org/">https://es.theodora.org/</a>                                                        |                                                                                                                                                                                                                                                                                                                                                                                                                                                                                                                                                                                                                                                                                            |
| 67 | Vall d'Hebron Institute of Oncology                              | Spain | <a href="https://www.vhio.net/">https://www.vhio.net/</a>                                                              |                                                                                                                                                                                                                                                                                                                                                                                                                                                                                                                                                                                                                                                                                            |
| 68 | Federació Catalana d'Entitats Contra el Càncer (FECEC)           | Spain | <a href="https://www.juntscontraelcancer.cat/">https://www.juntscontraelcancer.cat/</a>                                | <a href="https://www.juntscontraelcancer.cat/es/suport-serveis/viure-amb-cancer/">https://www.juntscontraelcancer.cat/es/suport-serveis/viure-amb-cancer/</a>                                                                                                                                                                                                                                                                                                                                                                                                                                                                                                                              |
| 69 | Sociedad Española de Oncología Médica                            | Spain | <a href="https://seom.org/">https://seom.org/</a><br><a href="https://oncosaludable.es/">https://oncosaludable.es/</a> | <a href="https://seom.org/informacion-sobre-el-cancer/prevencion-cancer">https://seom.org/informacion-sobre-el-cancer/prevencion-cancer</a><br><a href="https://seom.org/seomcms/images/stories/recursos/Guias_Nutricion_Ejercicio_Cancer_Mama.pdf">https://seom.org/seomcms/images/stories/recursos/Guias_Nutricion_Ejercicio_Cancer_Mama.pdf</a><br><a href="https://seom.org/guia-actualizada-de-tratamientos/cuidados-de-soporte?start=5">https://seom.org/guia-actualizada-de-tratamientos/cuidados-de-soporte?start=5</a>                                                                                                                                                            |
| 70 | Asociación Española Contra el Cáncer                             | Spain | <a href="https://www.aecc.es/es">https://www.aecc.es/es</a>                                                            | <a href="https://www.contraelcancer.es/sites/default/files/ebooks/GuiaAlimentacionYCancer_2018_INTERACTIVO.pdf">https://www.contraelcancer.es/sites/default/files/ebooks/GuiaAlimentacionYCancer_2018_INTERACTIVO.pdf</a><br><a href="https://www.contraelcancer.es/es/todo-sobre-cancer/prevencion/alimentacion">https://www.contraelcancer.es/es/todo-sobre-cancer/prevencion/alimentacion</a><br><a href="https://blog.contraelcancer.es/alimentacion-vida-sana/">https://blog.contraelcancer.es/alimentacion-vida-sana/</a><br><a href="https://blog.contraelcancer.es/consejos-para-pacientes-y-familiares/">https://blog.contraelcancer.es/consejos-para-pacientes-y-familiares/</a> |
| 71 | El Grupo Español de Pacientes con Cáncer                         | Spain | <a href="http://www.gepac.es/">http://www.gepac.es/</a>                                                                |                                                                                                                                                                                                                                                                                                                                                                                                                                                                                                                                                                                                                                                                                            |
| 72 | Lymphomamieloma.com                                              | Spain | <a href="https://www.linfomaymieloma.com/">https://www.linfomaymieloma.com/</a>                                        |                                                                                                                                                                                                                                                                                                                                                                                                                                                                                                                                                                                                                                                                                            |
| 73 | Asociación Andaluza de Hematología y Hemoterapia                 | Spain | <a href="https://www.aa-hh.org/">https://www.aa-hh.org/</a>                                                            |                                                                                                                                                                                                                                                                                                                                                                                                                                                                                                                                                                                                                                                                                            |
| 74 | Federación de Sociedades Españolas de Oncología (FESEO)          | Spain | <a href="https://www.feseo.com/home?lang=es&amp;setlang=es">https://www.feseo.com/home?lang=es&amp;setlang=es</a>      |                                                                                                                                                                                                                                                                                                                                                                                                                                                                                                                                                                                                                                                                                            |
| 75 | Sociedad Española de Hematología y Oncología Pediátricas (SEHOP) | Spain | <a href="https://www.sehop.org/">https://www.sehop.org/</a>                                                            |                                                                                                                                                                                                                                                                                                                                                                                                                                                                                                                                                                                                                                                                                            |
| 76 | Federación Española de Padres de Niños con Cáncer (FEPNC)        | Spain | <a href="https://cancerinfantil.org/">https://cancerinfantil.org/</a>                                                  |                                                                                                                                                                                                                                                                                                                                                                                                                                                                                                                                                                                                                                                                                            |
| 77 | Asociación de Afectados por Cáncer de Pulmón                     | Spain | <a href="https://afectadoscancerdepulmon.com/">https://afectadoscancerdepulmon.com/</a>                                |                                                                                                                                                                                                                                                                                                                                                                                                                                                                                                                                                                                                                                                                                            |

|     |                                                           |           |                                                                                                                                                                 |                                                                                                                                                                                                                                                                                                                                                                                                                                                |
|-----|-----------------------------------------------------------|-----------|-----------------------------------------------------------------------------------------------------------------------------------------------------------------|------------------------------------------------------------------------------------------------------------------------------------------------------------------------------------------------------------------------------------------------------------------------------------------------------------------------------------------------------------------------------------------------------------------------------------------------|
| 78  | Grupo Español de Cáncer de Pulmón                         | Spain     | <a href="https://www.gecp.org/">https://www.gecp.org/</a>                                                                                                       |                                                                                                                                                                                                                                                                                                                                                                                                                                                |
| 79  | Societat Catalano-Balear d'Oncologia                      | Spain     | <a href="http://webs.academia.cat/societats/oncologia/?p=page/html/activitats">http://webs.academia.cat/societats/oncologia/?p=page/html/activitats</a>         |                                                                                                                                                                                                                                                                                                                                                                                                                                                |
| 80  | Centro de Investigación del Cáncer                        | Spain     | <a href="https://www.cicancer.org/">https://www.cicancer.org/</a>                                                                                               |                                                                                                                                                                                                                                                                                                                                                                                                                                                |
| 81  | Centro Nacional de Investigaciones Oncológicas            | Spain     | <a href="https://www.cnio.es/">https://www.cnio.es/</a>                                                                                                         |                                                                                                                                                                                                                                                                                                                                                                                                                                                |
| 82  | Grup Oncològic Català Occità                              | Spain     | <a href="http://www.grupgoco.org/index.php/es/">http://www.grupgoco.org/index.php/es/</a>                                                                       |                                                                                                                                                                                                                                                                                                                                                                                                                                                |
| 83  | Fundación Contra el Cáncer                                | Spain     | <a href="https://www.fefoc.org/">https://www.fefoc.org/</a>                                                                                                     |                                                                                                                                                                                                                                                                                                                                                                                                                                                |
| 84  | Fundación Porsaleu                                        | Uruguay   | <a href="https://porsaleu.org/">https://porsaleu.org/</a>                                                                                                       |                                                                                                                                                                                                                                                                                                                                                                                                                                                |
| 85  | Comisión Honoraria de Lucha Contra el Cáncer              | Uruguay   | <a href="https://www.comisioncancer.org.uy/">https://www.comisioncancer.org.uy/</a>                                                                             | <a href="https://www.comisioncancer.org.uy/categoria/Alimentacion-saludable-24">https://www.comisioncancer.org.uy/categoria/Alimentacion-saludable-24</a>                                                                                                                                                                                                                                                                                      |
| 86  | American Cancer Society                                   | US        | <a href="https://www.cancer.org/es/">https://www.cancer.org/es/</a>                                                                                             | <a href="https://www.cancer.org/es/buscar.html?q=alimentacion">https://www.cancer.org/es/buscar.html?q=alimentacion</a><br><a href="https://www.cancer.org/content/dam/cancer-org/cancer-control/es/booklets-flyers/nutrition-for-the-patient-with-cancer-during-treatment-spanish.pdf">https://www.cancer.org/content/dam/cancer-org/cancer-control/es/booklets-flyers/nutrition-for-the-patient-with-cancer-during-treatment-spanish.pdf</a> |
| 87  | National Cancer Institute                                 | US        | <a href="https://www.cancer.gov/espanol">https://www.cancer.gov/espanol</a>                                                                                     | <a href="https://www.cancer.gov/espanol/cancer/sobrellevar/consejos-de-alimentacion.pdf">https://www.cancer.gov/espanol/cancer/sobrellevar/consejos-de-alimentacion.pdf</a>                                                                                                                                                                                                                                                                    |
| 88  | Cancer Care                                               | US        | <a href="https://www.cancercare.org/espanol">https://www.cancercare.org/espanol</a>                                                                             | <a href="https://media.cancercare.org/publications/original/364-fs_nutrition_esp.pdf">https://media.cancercare.org/publications/original/364-fs_nutrition_esp.pdf</a>                                                                                                                                                                                                                                                                          |
| 89  | Latinas Contra Cáncer                                     | US        | <a href="https://latinascontracancer.org/">https://latinascontracancer.org/</a>                                                                                 | <a href="https://latinascontracancer.org/health-education/">https://latinascontracancer.org/health-education/</a>                                                                                                                                                                                                                                                                                                                              |
| 90  | American Society of Clinical Oncology (ASCO)              | US        | <a href="https://www.cancer.net/es/">https://www.cancer.net/es/</a>                                                                                             | <a href="https://www.cancer.net/es/sobrevivencia/una-vida-saludable">https://www.cancer.net/es/sobrevivencia/una-vida-saludable</a>                                                                                                                                                                                                                                                                                                            |
| 91  | Acoustic Neuroma Asociation                               | US        | <a href="https://www.anausa.org/">https://www.anausa.org/</a>                                                                                                   |                                                                                                                                                                                                                                                                                                                                                                                                                                                |
| 92  | Cancer Research Institute                                 | US        | <a href="https://www.cancerresearch.org/">https://www.cancerresearch.org/</a>                                                                                   |                                                                                                                                                                                                                                                                                                                                                                                                                                                |
| 93  | Colon Cancer Alliance                                     | US        | <a href="https://www.ccalliance.org/espanol">https://www.ccalliance.org/espanol</a>                                                                             |                                                                                                                                                                                                                                                                                                                                                                                                                                                |
| 94  | Lymphoma Research Foundation                              | US        | <a href="https://lymphoma.org/es/">https://lymphoma.org/es/</a>                                                                                                 |                                                                                                                                                                                                                                                                                                                                                                                                                                                |
| 95  | Pancreatic Cancer Acrion Network                          | US        | <a href="https://www.pancan.org/section_en_espano">https://www.pancan.org/section_en_espano</a>                                                                 |                                                                                                                                                                                                                                                                                                                                                                                                                                                |
| 96  | International Neuroendocrine Cancer Alliance              | US        | <a href="https://incalliance.org/">https://incalliance.org/</a>                                                                                                 |                                                                                                                                                                                                                                                                                                                                                                                                                                                |
| 97  | Moffitt Cancer Centre                                     | US        | <a href="https://moffitt.org/">https://moffitt.org/</a>                                                                                                         |                                                                                                                                                                                                                                                                                                                                                                                                                                                |
| 98  | International Waldenstrom Macroglobulinemia Foundation    | US        | <a href="https://iwmf.com/">https://iwmf.com/</a>                                                                                                               |                                                                                                                                                                                                                                                                                                                                                                                                                                                |
| 99  | University of Miami Sylvester Comprehensive Cancer Center | US        | <a href="https://umiamihealth.org/locations/sylvester-comprehensive-cancer-center">https://umiamihealth.org/locations/sylvester-comprehensive-cancer-center</a> |                                                                                                                                                                                                                                                                                                                                                                                                                                                |
| 100 | Sociedad Anticancerosa de Venezuela                       | Venezuela | <a href="https://www.sociedadanticancerosa.org/">https://www.sociedadanticancerosa.org/</a>                                                                     | <a href="https://www.ayudaalpacienteoncologico.org.ve/">https://www.ayudaalpacienteoncologico.org.ve/</a><br><a href="https://www.laloncherademihijo.org/">https://www.laloncherademihijo.org/</a>                                                                                                                                                                                                                                             |

100 cancer organization with content in Spanish on their website. The organizations in green colour provided some information about nutrition. The organizations in yellow colour were selected for presentation in this review as they provided more extended content about nutrition for cancer management.
